# Supplementary material for: Association Between Novel Lipid and Obesity Indices with New-Onset Stroke: A Long-Term Study Based on the English Longitudinal Study of Ageing (ELSA)
Source: Research Square preprint supplement (doi:10.21203/rs.3.rs-7831860/v1), 2025-10-29
Supplement: Supplementary file 1 [file 7b5efb2966cc4ac17e123d56.docx]

Table. Relationship between AIP/BR/ABSI/WHTR and STROKE in different models after removing the missing variables

| Exposure | Non-adjusted | Adjust I | Adjust II |
| --- | --- | --- | --- |
| AIP | 3.22 (1.59, 6.49) 0.001 | 3.32 (1.56, 7.04) 0.002 | 3.04 (1.42, 6.52) 0.004 |
| AIP quartile |  |  |  |
| Q1 | 1 | 1 | 1 |
| Q2 | 0.95 (0.44, 2.06) 0.890 | 0.85 (0.39, 1.85) 0.680 | 0.82 (0.38, 1.80) 0.624 |
| Q3 | 2.20 (1.11, 4.34) 0.023 | 1.92 (0.97, 3.82) 0.062 | 1.84 (0.93, 3.67) 0.082 |
| Q4 | 2.27 (1.16, 4.47) 0.017 | 2.09 (1.05, 4.15) 0.036 | 1.94 (0.97, 3.90) 0.061 |
| *P* for trend | 0.002 | 0.004 | 0.007 |
| BRI | 1.20 (1.07, 1.34) 0.001 | 1.17 (1.04, 1.32) 0.011 | 1.14 (1.01, 1.29) 0.033 |
| BRI quartile |  |  |  |
| Q1 | 1 | 1 | 1 |
| Q2 | 1.29 (0.64, 2.62) 0.475 | 1.03 (0.51, 2.12) 0.927 | 1.02 (0.50, 2.10) 0.951 |
| Q3 | 1.29 (0.64, 2.61) 0.477 | 0.86 (0.42, 1.77) 0.680 | 0.82 (0.40, 1.70) 0.593 |
| Q4 | 2.56 (1.37, 4.80) 0.003 | 1.90 (1.00, 3.60) 0.049 | 1.74 (0.91, 3.32) 0.092 |
| *P* for trend | 0.002 | 0.033 | 0.071 |
| WHTR | 79.33 (5.81, 1082.91) 0.001 | 38.94 (2.27, 667.80) 0.012 | 22.89 (1.29, 407.34) 0.033 |
| WHTR quartile |  |  |  |
| Q1 | 1 | 1 | 1 |
| Q2 | 1.29 (0.64, 2.62) 0.475 | 1.03 (0.51, 2.12) 0.927 | 1.02 (0.50, 2.10) 0.951 |
| Q3 | 1.29 (0.64, 2.61) 0.477 | 0.86 (0.42, 1.77) 0.680 | 0.82 (0.40, 1.70) 0.593 |
| Q4 | 2.56 (1.37, 4.80) 0.003 | 1.90 (1.00, 3.60) 0.049 | 1.74 (0.91, 3.32) 0.092 |
| *P* for trend | 1.37 (1.12, 1.67) 0.002 | 1.26 (1.02, 1.55) 0.033 | 1.22 (0.98, 1.50) 0.071 |
| Data in the table: β(95%CI) *P* value / OR (95%CI) *P* value | | | |
| Non-adjusted model adjust for: None | | | |
| Adjust I model adjust for: AGE; SEX | | | |
| Adjust II model adjust for: AGE; SEX; EDUCATIONAL BACKGROUND; MARITAL STATUS; SMOKE; DRINK | | | |
